# Supplementary material
Source: publisher figshare collection journal article supplement (https://gsapubs.figshare.com/ndownloader/files/23347427)
Supplement: Supplementary file 1 [file 23347427]

## Sheet: J10R1-49_P1Sc1
Sample	J10R1_49	J10R1_49	J10R1_49	J10R1_49	J10R1_49	J10R1_49	J10R1_49	J10R1_49	J10R1_49	J10R1_49	J10R1_49	J10R1_49	J10R1_49	J10R1_49	J10R1_49	J10R1_49	J10R1_49	J10R1_49	J10R1_49	J10R1_49	J10R1_49	J10R1_49	J10R1_49	J10R1_49	J10R1_49	J10R1_49	J10R1_49	J10R1_49	J10R1_49
Comment	Pl1_Sc1	Pl1_Sc1	Pl1_Sc1	Pl1_Sc1	Pl1_Sc1	Pl1_Sc1	Pl1_Sc1	Pl1_Sc1	Pl1_Sc1	Pl1_Sc1	Pl1_Sc1	Pl1_Sc1	Pl1_Sc1	Pl1_Sc1	Pl1_Sc1	Pl1_Sc1	Pl1_Sc1	Pl1_Sc1	Pl1_Sc1	Pl1_Sc1	Pl1_Sc1	Pl1_Sc1	Pl1_Sc1	Pl1_Sc1	Pl1_Sc1	Pl1_Sc1	Pl1_Sc1	Pl1_Sc1	Pl1_Sc1
wt% Oxide
Na2O	1.9249	1.9653	2.0044	1.9694	1.9316	1.9236	1.8818	1.8588	1.8602	1.8629	1.8278	1.8413	1.844	1.8063	1.8696	1.8656	1.8737	1.8359	1.8683	1.8548	1.8777	1.8791	1.906	1.8467	1.8683	1.8993	1.8939	1.7551	1.7214
MgO	0.0365	0.0365	0.0398	0.0365	0.0365	0.0431	0.0431	0.0398	0.0481	0.0415	0.0431	0.0415	0.0448	0.0415	0.0464	0.0497	0.0531	0.0431	0.0448	0.0431	0.0415	0.0448	0.0497	0.0431	0.0464	0.0398	0.0398	0.0365	0.0356
Al2O3	32.8464	33.0278	32.6896	32.7973	32.769	32.8181	32.8408	32.786	32.8238	32.9201	33.0203	32.7709	32.7935	33.0222	33.0052	32.8578	32.7746	32.9541	32.8521	32.837	32.9768	32.8238	33.0316	32.9938	33.0222	32.9296	33.0883	33.2187	33.179
SiO2	46.3872	46.6803	46.6632	46.3487	46.5541	46.353	46.3637	46.1647	46.1305	46.4899	46.3423	46.3701	46.3701	46.2524	46.1968	46.1326	45.8117	46.0706	46.1947	46.2588	46.2995	46.4236	46.2161	46.1647	46.3765	46.2417	46.2332	46.0963	45.5486
K2O	0.0229	0.0301	0.0133	0.0217	0.0205	0.0301	0.0253	0.0205	0.0229	0.0205	0.0229	0.0265	0.0265	0.0217	0.0205	0.0289	0.0229	0.0181	0.0217	0.0229	0.0181	0.0193	0.0301	0.0229	0.0277	0.0205	0.0253	0.0145	0.0193
CaO	16.8269	16.8548	16.6743	16.8003	16.8451	16.7821	16.894	16.8409	16.9668	16.9892	16.9388	16.8241	16.9738	17.0759	17.0745	16.88	16.8688	16.9066	16.8884	16.9388	16.9038	16.8996	16.8381	16.929	17.0004	16.9374	16.9906	17.1249	17.2914
TiO2	0.0584	0.0467	0.0551	0.0367	0.0751	0.0734	0.0534	0.0467	0.0417	0.0617	0.0517	0.0317	0.0434	0.0384	0.0517	0.0501	0.0501	0.03	0.0467	0.0567	0.0551	0.0467	0.0384	0.0601	0.0434	0.0534	0.045	0.025	0.045
Cr2O3	0.0132	0	0.0161	0.0088	0.0029	0	0.0102	0.0351	0.0219	0	0	0.0234	0.0146	0.0132	0.0205	0.0219	0.0117	0	0.0117	0.0161	0.0263	0.0278	0.0263	0	0.0146	0	0	0.0497	0.0205
MnO	0	0.0039	0.0013	0	0.0013	0.0013	0	0.0323	0.0026	0.0155	0.0284	0.0116	0	0.0039	0	0.0232	0.0065	0	0	0.0116	0.0284	0.0168	0.0077	0.0207	0	0	0	0	0.0232
FeO	0.3383	0.3576	0.3576	0.3499	0.3576	0.3795	0.3679	0.3795	0.3898	0.3847	0.3859	0.3731	0.3821	0.3705	0.3847	0.4117	0.3795	0.3898	0.3937	0.3705	0.4117	0.395	0.3859	0.3769	0.3872	0.3808	0.3782	0.3512	0.3692
Total	98.4547	99.0031	98.5147	98.3692	98.5936	98.4041	98.4802	98.2043	98.3082	98.7859	98.6613	98.3141	98.4928	98.6458	98.6699	98.3216	97.8526	98.2483	98.322	98.4104	98.6388	98.5763	98.53	98.4579	98.7867	98.5025	98.6943	98.6717	98.2491
Distance [µm]	0	5.37436	9.48673	14.8611	19.9236	24.3478	29.4103	34.7847	39.2089	44.2714	49.6458	53.7582	59.1325	64.195	68.6193	73.6817	79.0561	83.1685	88.5428	93.6053	98.0296	103.404	108.466	112.891	117.953	123.328	127.44	132.814	137.877

## Sheet: J10R1-49_P2Sc1
Sample	J10R1_49	J10R1_49	J10R1_49	J10R1_49	J10R1_49	J10R1_49	J10R1_49	J10R1_49	J10R1_49	J10R1_49	J10R1_49	J10R1_49	J10R1_49	J10R1_49	J10R1_49	J10R1_49	J10R1_49	J10R1_49	J10R1_49	J10R1_49	J10R1_49	J10R1_49
Comment	Pl2_Sc1	Pl2_Sc1	Pl2_Sc1	Pl2_Sc1	Pl2_Sc1	Pl2_Sc1	Pl2_Sc1	Pl2_Sc1	Pl2_Sc1	Pl2_Sc1	Pl2_Sc1	Pl2_Sc1	Pl2_Sc1	Pl2_Sc1	Pl2_Sc1	Pl2_Sc1	Pl2_Sc1	Pl2_Sc1	Pl2_Sc1	Pl2_Sc1	Pl2_Sc1	Pl2_Sc1
wt% Oxide
Na2O	1.7712	1.8265	1.871	1.9101	1.8966	1.9236	1.8683	1.9074	1.8804	1.844	1.8642	1.9262	1.9478	1.875	1.8737	1.7955	1.7564	1.9316	1.8723	1.8737	1.9155	1.7928
MgO	0.0348	0.0315	0.0381	0.0431	0.0431	0.0514	0.0381	0.0381	0.0448	0.0365	0.0381	0.0448	0.0448	0.0415	0.0415	0.0348	0.0332	0.0415	0.0431	0.0415	0.0381	0.0464
Al2O3	33.2451	33.0562	33.0127	33.1091	32.99	32.7539	32.8483	32.8559	32.8124	32.8257	32.7557	32.786	32.7161	32.6858	32.8597	32.8464	32.9541	32.8143	32.7255	32.8049	32.7822	32.8483
SiO2	45.9593	46.4	46.4749	46.4535	46.3316	46.1112	46.1968	46.2546	46.1776	46.3594	45.9059	46.1989	45.9016	45.9914	45.831	45.5743	45.8139	46.0813	45.9508	45.9486	45.9743	45.6256
K2O	0.0229	0.0169	0.0241	0.0289	0.0241	0.0241	0.0229	0.0241	0.0181	0.0241	0.0217	0.0265	0.0253	0.0253	0.0193	0.0217	0.0193	0.0205	0.0193	0.0217	0.0217	0.0229
CaO	17.1739	16.8842	17.0004	16.9066	16.8423	16.7989	16.7765	16.7919	16.9234	16.9542	16.6967	16.8507	16.659	16.9612	16.9542	17.0801	17.0367	16.8604	16.7499	16.7415	16.8213	16.901
TiO2	0.0317	0.0317	0.0534	0.0768	0.0584	0.0551	0.0517	0.0534	0.0384	0.0501	0.0517	0.0217	0.04	0.0567	0.03	0.0334	0.0133	0.0534	0.0467	0.0667	0.0334	0.045
Cr2O3	0	0.0117	0.0073	0.0132	0.0015	0.0248	0.0044	0	0.0161	0.0044	0.0365	0.0044	0	0.0263	0.0117	0.0351	0.0234	0	0	0	0.0219	0.0044
MnO	0	0.0258	0.0142	0	0.0142	0	0.0052	0	0.0052	0.0374	0.0232	0.022	0.0168	0.022	0.0039	0	0	0.0155	0.0026	0.0271	0	0.0374
FeO	0.3371	0.3422	0.3538	0.3808	0.3589	0.3757	0.3679	0.3306	0.3667	0.3679	0.3937	0.3975	0.4027	0.3667	0.3499	0.3216	0.3268	0.3293	0.3551	0.3319	0.3705	0.3679
Total	98.576	98.6267	98.8499	98.922	98.5607	98.1186	98.1801	98.256	98.2829	98.5037	97.7876	98.2786	97.754	98.0519	97.9748	97.7429	97.9771	98.1478	97.7653	97.8576	97.9789	97.6919
Distance [µm]	0	4.97748	9.88859	14.8661	19.8435	24.7547	29.7321	35.3828	40.3602	44.5982	50.2488	55.2263	60.1374	65.1149	70.7655	75.0035	79.981	85.6316	90.609	95.5202	100.498	105.475

## Sheet: J11R1-26_P1Sc1
Sample	J11R1_26	J11R1_26	J11R1_26	J11R1_26	J11R1_26	J11R1_26	J11R1_26	J11R1_26	J11R1_26	J11R1_26	J11R1_26	J11R1_26	J11R1_26	J11R1_26	J11R1_26	J11R1_26	J11R1_26	J11R1_26	J11R1_26	J11R1_26	J11R1_26	J11R1_26	J11R1_26	J11R1_26	J11R1_26	J11R1_26	J11R1_26	J11R1_26	J11R1_26	J11R1_26	J11R1_26	J11R1_26	J11R1_26	J11R1_26	J11R1_26
Comment	Pl1_Sc1	Pl1_Sc1	Pl1_Sc1	Pl1_Sc1	Pl1_Sc1	Pl1_Sc1	Pl1_Sc1	Pl1_Sc1	Pl1_Sc1	Pl1_Sc1	Pl1_Sc1	Pl1_Sc1	Pl1_Sc1	Pl1_Sc1	Pl1_Sc1	Pl1_Sc1	Pl1_Sc1	Pl1_Sc1	Pl1_Sc1	Pl1_Sc1	Pl1_Sc1	Pl1_Sc1	Pl1_Sc1	Pl1_Sc1	Pl1_Sc1	Pl1_Sc1	Pl1_Sc1	Pl1_Sc1	Pl1_Sc1	Pl1_Sc1	Pl1_Sc1	Pl1_Sc1	Pl1_Sc1	Pl1_Sc1	Pl1_Sc1
wt% Oxide
Na2O	1.8305	1.8009	1.875	1.8791	1.9276	1.9289	1.9559	1.9653	1.9869	2.0354	2.0381	2.0853	2.0152	2.0583	2.053	2.0422	2.0543	2.0166	2.0004	1.9519	1.9249	1.9478	1.8737	1.8562	1.8332	1.8305	1.84	1.8332	1.9411	2.0152	1.9667	1.8413	1.7699	1.8764	1.8265
MgO	0.0381	0.0282	0.0332	0.0348	0.0332	0.0348	0.0348	0.0332	0.0315	0.0332	0.0365	0.0431	0.0365	0.0431	0.0332	0.0365	0.0348	0.0332	0.0381	0.0365	0.0415	0.0332	0.0348	0.0282	0.0315	0.0315	0.0348	0.0298	0.0332	0.0282	0.0298	0.0298	0.0332	0.0298	0.0232
Al2O3	33.0184	33.7609	33.7402	33.5663	33.5096	33.3717	33.4435	33.3547	33.281	33.4889	33.3018	33.2451	33.2357	33.3226	33.298	33.2224	33.1922	33.4208	33.2111	33.4567	33.4605	33.4737	33.5852	33.5437	33.6589	33.6891	33.6627	33.5361	33.2942	33.6476	32.6235	33.5153	31.7732	33.6495	33.6646
SiO2	46.0299	46.7509	46.6118	46.676	46.8579	46.8878	46.8771	47.0654	47.1959	47.0911	47.1467	47.0911	46.9199	47.121	47.213	46.9477	47.228	47.1082	47.1595	46.8707	46.8087	46.9413	46.7488	46.952	46.7509	46.6974	46.7702	46.7702	46.2075	46.2974	45.4887	46.614	44.4019	46.6118	46.6953
K2O	0.0277	0.0289	0.0217	0.0169	0.0265	0.0301	0.0313	0.0301	0.0205	0.0301	0.0229	0.0229	0.0205	0.0301	0.0265	0.0205	0.0229	0.0301	0.0217	0.0277	0.0217	0.0217	0.0253	0.0181	0.0241	0.0205	0.0181	0.0157	0.0205	0.0169	0.0205	0.0205	0.0181	0.0145	0.0229
CaO	17.0325	17.4201	17.4943	17.2886	17.2788	17.2662	17.2606	17.1039	17.0088	17.006	17.0423	17.0759	16.9472	16.9682	16.8828	17.0032	16.992	17.0549	16.9598	17.1319	17.3586	17.1963	17.1781	17.248	17.3488	17.4285	17.3823	17.3977	16.9668	16.6072	16.6953	17.2942	18.9173	17.3222	17.3698
TiO2	0.025	0.0267	0.0567	0.0484	0.0584	0.045	0.03	0.0334	0.0217	0.015	0.0234	0.025	0.0267	0.0267	0.0317	0.0551	0.02	0.0267	0.0234	0.0501	0.03	0.02	0.0133	0.0384	0.0117	0.02	0.03	0.0334	0.0083	0.035	0.0601	0.0534	0.0534	0.0184	0.0517
Cr2O3	0.0058	0.0365	0	0.0117	0	0.0205	0.0278	0	0	0.0307	0.0263	0	0.0146	0.0263	0.0073	0.0146	0.0219	0.0044	0.0015	0.0088	0	0.0073	0	0	0.0073	0.0234	0.0205	0	0	0.0117	0	0.0029	0.0073	0	0
MnO	0.0077	0	0.022	0.0426	0.0129	0.031	0.0026	0.0052	0	0.022	0.0232	0.0052	0.009	0	0.022	0	0.0116	0.0155	0.0013	0	0.0129	0.0103	0.022	0.0129	0.0026	0.022	0.0116	0	0.0271	0	0.0245	0	0.0258	0.0207	0.0103
FeO	0.2406	0.256	0.2676	0.2856	0.2522	0.2689	0.2406	0.2316	0.2547	0.256	0.2522	0.2367	0.238	0.2509	0.2406	0.256	0.2303	0.2624	0.2393	0.2586	0.2676	0.2457	0.247	0.238	0.2419	0.2367	0.2573	0.2509	0.2444	0.2084	0.2084	0.2161	0.2084	0.238	0.211
Total	98.2564	100.109	100.122	99.85	99.957	99.885	99.9042	99.8227	99.801	100.008	99.9134	99.8303	99.4633	99.8472	99.808	99.5981	99.808	99.9728	99.656	99.7928	99.9263	99.8973	99.7281	99.9353	99.9108	99.9997	100.028	99.867	98.7431	98.8675	97.1175	99.5876	97.2084	99.7812	99.8752
Distance [µm]	1.81899e-12	4.98225	10.2817	15.2639	20.2462	24.6979	29.6801	34.1319	39.1141	43.5658	48.5481	52.9998	57.9821	62.9643	67.416	72.3983	76.85	81.8323	87.1317	92.1139	96.5657	101.548	106	110.982	115.964	120.416	125.398	129.85	134.832	139.284	144.266	148.718	153.7	158.682	163.982

## Sheet: J11R1-26_P2Sc1
Sample	J11R1_26	J11R1_26	J11R1_26	J11R1_26	J11R1_26	J11R1_26	J11R1_26	J11R1_26	J11R1_26	J11R1_26	J11R1_26	J11R1_26	J11R1_26	J11R1_26	J11R1_26	J11R1_26	J11R1_26	J11R1_26	J11R1_26	J11R1_26	J11R1_26
Comment	Pl2_Sc1	Pl2_Sc1	Pl2_Sc1	Pl2_Sc1	Pl2_Sc1	Pl2_Sc1	Pl2_Sc1	Pl2_Sc1	Pl2_Sc1	Pl2_Sc1	Pl2_Sc1	Pl2_Sc1	Pl2_Sc1	Pl2_Sc1	Pl2_Sc1	Pl2_Sc1	Pl2_Sc1	Pl2_Sc1	Pl2_Sc1	Pl2_Sc1	Pl2_Sc1
wt% Oxide
Na2O	1.7753	1.7631	1.7834	1.7079	1.6863	1.627	1.6081	1.5502	1.5394	1.5367	1.5812	1.6513	1.6432	1.623	1.6567	1.6593	1.7402	1.7348	1.7753	1.871	1.7173
MgO	0.0298	0.0332	0.0547	0.0315	0.0315	0.0348	0.0298	0.0348	0.0348	0.0365	0.0332	0.0348	0.0381	0.0332	0.0348	0.0365	0.0348	0.0398	0.0365	0.0348	0.0348
Al2O3	33.8082	33.8422	33.7496	33.8138	33.8214	33.9745	34.0897	33.9234	33.9669	34.1502	33.812	34.0104	33.8724	33.8554	33.8856	33.8479	33.8516	33.7572	33.6816	33.708	33.7232
SiO2	46.7423	46.6418	46.4856	46.5198	46.4557	46.4043	46.2032	46.3102	46.2011	46.2995	46.0385	46.0684	46.2396	46.3787	46.537	46.3658	46.4835	46.4471	46.6568	46.614	46.6632
K2O	0.0265	0.0229	0.0265	0.0193	0.0217	0.012	0.0193	0.0217	0.0181	0.0157	0.0193	0.012	0.0133	0.0181	0.0145	0.0133	0.0217	0.0217	0.0229	0.0217	0.0265
CaO	17.5265	17.2788	17.6216	17.5307	17.5111	17.8133	17.8301	17.8637	17.8819	17.8693	17.8315	17.8637	17.728	17.7112	17.7112	17.6944	17.5181	17.4061	17.574	17.4243	17.4705
TiO2	0.0184	0.0367	0.0434	0.0417	0.025	0.0501	0.0234	0.0384	0.0517	0.0284	0.02	0.0317	0.0334	0.0284	0.0234	0.0217	0.0317	0.01	0.035	0.035	0.0334
Cr2O3	0.0058	0.0029	0.0146	0.0205	0.0219	0.0205	0.0102	0.0088	0	0.019	0.0015	0.019	0	0.0278	0.0278	0.0073	0	0	0.0278	0	0.0073
MnO	0	0.0052	0	0.0258	0.0039	0	0.0052	0	0.0039	0.0336	0.0245	0.022	0.0065	0.0026	0.0374	0.009	0.0103	0.009	0	0.0258	0
FeO	0.2419	0.2161	0.1981	0.229	0.2148	0.256	0.2354	0.2483	0.2329	0.2329	0.2534	0.2354	0.2367	0.2367	0.229	0.2496	0.2406	0.22	0.2239	0.2393	0.2046
Total	100.175	99.8429	99.9775	99.94	99.7933	100.192	100.054	99.9994	99.9306	100.222	99.615	99.9487	99.8111	99.9148	100.157	99.9047	99.9325	99.6458	100.034	99.974	99.8807
Distance [µm]	0	4.98461	9.0507	14.0353	18.023	22.0891	27.0737	31.1398	36.1244	40.1121	45.1751	49.1628	54.1474	58.2135	63.1981	67.2642	71.2519	76.2365	80.3026	85.2872	89.2749

## Sheet: J11R1-26_P3Sc1
Sample	J11R1_26	J11R1_26	J11R1_26	J11R1_26	J11R1_26	J11R1_26	J11R1_26	J11R1_26	J11R1_26	J11R1_26	J11R1_26	J11R1_26	J11R1_26	J11R1_26	J11R1_26	J11R1_26	J11R1_26	J11R1_26	J11R1_26	J11R1_26	J11R1_26	J11R1_26	J11R1_26	J11R1_26	J11R1_26	J11R1_26	J11R1_26	J11R1_26
Comment	Pl3_Sc2	Pl3_Sc2	Pl3_Sc2	Pl3_Sc2	Pl3_Sc2	Pl3_Sc2	Pl3_Sc2	Pl3_Sc2	Pl3_Sc2	Pl3_Sc2	Pl3_Sc2	Pl3_Sc2	Pl3_Sc2	Pl3_Sc2	Pl3_Sc2	Pl3_Sc2	Pl3_Sc2	Pl3_Sc2	Pl3_Sc2	Pl3_Sc2	Pl3_Sc2	Pl3_Sc2	Pl3_Sc2	Pl3_Sc2	Pl3_Sc2	Pl3_Sc2	Pl3_Sc2	Pl3_Sc2
wt% Oxide
Na2O	1.7888	1.9384	1.9492	2.0381	2.0583	2.0557	2.1338	2.0678	2.1001	2.1109	2.1716	2.1702	2.2336	2.212	2.2471	2.2686	2.2538	2.2134	2.2457	2.1972	2.2039	2.2754	2.2228	2.2093	2.3091	2.2619	2.1514	1.9276
MgO	0.0332	0.0298	0.0531	0.0332	0.0381	0.0348	0.0348	0.0348	0.0398	0.0348	0.0332	0.0381	0.0365	0.0365	0.0365	0.0348	0.0381	0.0332	0.0381	0.0381	0.0365	0.0381	0.0365	0.0365	0.0332	0.0365	0.0315	0.0332
Al2O3	33.6589	33.6287	33.5399	33.3755	33.3755	33.298	33.2602	33.3453	33.1034	33.0184	33.0278	33.0241	33.0599	33.1299	33.1299	32.9825	32.9617	33.0977	32.9844	32.99	32.9863	33.0033	32.9466	33.0297	32.9182	32.854	33.2432	33.3566
SiO2	46.83	46.8857	46.8151	47.1723	47.0461	47.3135	47.2044	47.2066	47.4333	47.397	47.6302	47.5425	47.7628	47.7072	47.8334	48.0003	47.7115	47.6772	47.6922	47.6644	47.628	47.673	47.7435	47.8441	47.8719	47.7863	47.6473	47.0632
K2O	0.0193	0.0301	0.0229	0.0313	0.0193	0.0241	0.0241	0.0241	0.0193	0.0253	0.0349	0.0277	0.0253	0.0253	0.0325	0.0241	0.0265	0.0241	0.0217	0.0229	0.0277	0.0301	0.0277	0.0253	0.0241	0.0241	0.0289	0.0217
CaO	17.3782	17.346	17.2019	17.0647	17.1207	16.9276	16.8227	16.9444	16.7275	16.8409	16.7331	16.7121	16.5974	16.6072	16.5428	16.6324	16.6338	16.5904	16.7177	16.6576	16.5876	16.6198	16.5484	16.5708	16.4771	16.4869	16.7989	17.0661
TiO2	0.0551	0.03	0.0334	0.035	0.0501	0.0417	0.0317	0.0334	0.0484	0.045	0.03	0.0534	0.0384	0.0267	0.0651	0.0484	0.0501	0.045	0.035	0.0234	0.0551	0.0467	0.0417	0.0484	0.0551	0.0284	0.02	0.0334
Cr2O3	0	0.0234	0.0044	0.0102	0	0.0219	0	0.0424	0.0044	0	0.0248	0.0307	0	0.0117	0.0088	0	0.0102	0	0	0.0175	0.0205	0.0263	0.0044	0.0029	0.0058	0.0058	0	0.0088
MnO	0.0142	0	0.009	0.0207	0.0103	0.0142	0.0077	0.0129	0.0103	0.0065	0	0	0.009	0.0232	0.0207	0.0181	0.0026	0.009	0	0.0142	0.0349	0	0.0129	0.0077	0	0.0232	0	0.0039
FeO	0.2033	0.2084	0.2187	0.2354	0.1788	0.1955	0.2046	0.2148	0.184	0.1968	0.193	0.1891	0.1724	0.1698	0.1763	0.1724	0.184	0.2097	0.1814	0.1994	0.1955	0.2007	0.184	0.1634	0.1763	0.1634	0.1724	0.157
Total	99.9808	100.121	99.8474	100.016	99.8973	99.9271	99.7241	99.9264	99.6705	99.6756	99.8786	99.7879	99.9353	99.9495	100.093	100.181	99.8722	99.8998	99.9163	99.8247	99.7759	99.9133	99.7685	99.9382	99.8707	99.6705	100.094	99.6714
Distance [µm]	0	4.95709	9.42391	19.7194	24.1862	30.0149	34.4817	39.4388	49.244	55.0727	59.5395	64.4966	69.835	74.7921	79.2589	85.0876	89.5544	94.8928	99.8499	104.317	110.145	114.612	119.569	124.908	129.374	134.332	144.627	149.965

## Sheet: J25G1-32_P2Sc1
Sample	J25G1_32	J25G1_32	J25G1_32	J25G1_32	J25G1_32	J25G1_32	J25G1_32	J25G1_32	J25G1_32	J25G1_32	J25G1_32	J25G1_32	J25G1_32	J25G1_32	J25G1_32	J25G1_32	J25G1_32	J25G1_32	J25G1_32	J25G1_32	J25G1_32	J25G1_32	J25G1_32	J25G1_32	J25G1_32	J25G1_32	J25G1_32	J25G1_32	J25G1_32	J25G1_32	J25G1_32	J25G1_32	J25G1_32	J25G1_32	J25G1_32	J25G1_32	J25G1_32	J25G1_32	J25G1_32	J25G1_32	J25G1_32	J25G1_32	J25G1_32	J25G1_32	J25G1_32	J25G1_32	J25G1_32	J25G1_32	J25G1_32
Comment	Pl2_Sc1	Pl2_Sc1	Pl2_Sc1	Pl2_Sc1	Pl2_Sc1	Pl2_Sc1	Pl2_Sc1	Pl2_Sc1	Pl2_Sc1	Pl2_Sc1	Pl2_Sc1	Pl2_Sc1	Pl2_Sc1	Pl2_Sc1	Pl2_Sc1	Pl2_Sc1	Pl2_Sc1	Pl2_Sc1	Pl2_Sc1	Pl2_Sc1	Pl2_Sc1	Pl2_Sc1	Pl2_Sc1	Pl2_Sc1	Pl2_Sc1	Pl2_Sc1	Pl2_Sc1	Pl2_Sc1	Pl2_Sc1	Pl2_Sc1	Pl2_Sc1	Pl2_Sc1	Pl2_Sc1	Pl2_Sc1	Pl2_Sc1	Pl2_Sc1	Pl2_Sc1	Pl2_Sc1	Pl2_Sc1	Pl2_Sc1	Pl2_Sc1	Pl2_Sc1	Pl2_Sc1	Pl2_Sc1	Pl2_Sc1	Pl2_Sc1	Pl2_Sc1	Pl2_Sc1	Pl2_Sc1
wt% Oxide
Na2O	2.6649	2.6703	2.5908	2.6353	2.483	2.4331	2.4493	2.3805	2.4169	2.3792	2.4479	2.4007	2.4034	2.4573	2.5194	2.4088	2.456	2.3953	2.3899	2.4681	2.4129	2.4654	2.452	2.4385	2.5355	2.4627	2.5504	2.487	2.5571	2.5113	2.4708	2.4546	2.4964	2.5571	2.6029	2.5504	2.4951	2.5746	2.5665	2.6285	2.5086	2.5531	2.5517	2.6002	2.6191	2.5665	2.576	2.5557	2.6151
MgO	0.0481	0.0547	0.0531	0.0547	0.058	0.0514	0.0514	0.0564	0.058	0.0564	0.063	0.0514	0.0614	0.0547	0.063	0.0597	0.058	0.0564	0.063	0.063	0.0597	0.0597	0.0564	0.0614	0.0647	0.0597	0.0597	0.0564	0.0614	0.058	0.063	0.0614	0.0564	0.063	0.0614	0.0614	0.0597	0.0597	0.063	0.0564	0.0564	0.0614	0.0647	0.0796	0.0531	0.058	0.0564	0.0531	0.0514
Al2O3	31.3292	31.624	31.4293	31.6636	31.6976	31.6523	31.8375	32.0415	31.8809	31.8639	31.8375	31.9773	31.8337	31.7203	31.5711	31.7184	31.8072	31.52	31.6372	31.7184	31.7978	31.8035	31.7713	31.7676	31.7052	31.6901	31.7713	31.6995	31.5522	31.7335	31.7241	31.8053	31.5786	31.5994	31.8129	31.7147	31.6976	31.5408	31.5862	31.3103	31.6013	31.5238	31.435	31.3859	31.5559	31.5805	31.5786	31.5408	31.6372
SiO2	47.8954	48.0944	48.227	48.0666	47.8099	47.5104	47.4761	47.4226	47.566	47.3948	47.489	47.5724	47.4526	47.5724	47.6409	47.6302	47.3713	47.3093	47.4333	47.8099	47.7136	47.536	47.6858	47.7307	47.7714	47.7286	47.8248	47.7414	47.8612	47.7863	47.7243	47.6173	47.6687	47.6173	47.8933	47.827	47.8826	47.6302	47.7821	47.7521	47.6965	47.6259	47.7286	47.6858	47.9682	48.0644	47.8698	48.0837	48.0259
K2O	0.0205	0.0217	0.0229	0.0193	0.0217	0.0217	0.0217	0.0217	0.0205	0.0205	0.0217	0.0217	0.0253	0.0181	0.0205	0.0205	0.0277	0.012	0.0253	0.0241	0.0265	0.0181	0.0205	0.0229	0.0181	0.0217	0.0229	0.0193	0.0241	0.0169	0.0169	0.0217	0.0205	0.0241	0.0229	0.0193	0.0229	0.0253	0.0241	0.0277	0.0229	0.0193	0.0169	0.0241	0.0241	0.0205	0.0241	0.0229	0.0181
CaO	15.0205	15.152	14.9771	15.1198	15.208	15.3031	15.5004	15.4542	15.5382	15.4193	15.3661	15.3521	15.5074	15.5298	15.3367	15.3549	15.4486	15.3955	15.2793	15.52	15.4151	15.4766	15.3395	15.3899	15.3073	15.3241	15.443	15.2486	15.2639	15.3339	15.3185	15.4598	15.3003	15.2807	15.1968	15.2821	15.2584	15.3283	15.2709	15.0359	15.1828	15.2416	15.2192	15.2891	15.2304	15.2402	15.187	15.1604	15.257
TiO2	0.0284	0.0434	0.0701	0.0501	0.0617	0.0584	0.0501	0.0584	0.0651	0.0667	0.03	0.0434	0.0484	0.0651	0.0434	0.0667	0.0584	0.0417	0.0417	0.0551	0.0334	0.0434	0.0501	0.0501	0.0567	0.045	0.0484	0.0467	0.0634	0.04	0.0551	0.0634	0.0467	0.0634	0.0367	0.0501	0.0384	0.0417	0.0567	0.0601	0.0818	0.0317	0.0417	0.0484	0.0601	0.0534	0.0584	0.0534	0.0467
Cr2O3	0.0263	0.0029	0	0.0219	0.0234	0.0029	0.0219	0	0	0.0205	0.0058	0	0	0	0.0263	0.0263	0.0132	0.0102	0.0102	0	0.0205	0.0161	0.0015	0.0146	0.0132	0.019	0	0.019	0	0	0.0219	0.0073	0.0029	0.0248	0	0.0205	0.0205	0.0015	0.0438	0.0146	0.0044	0.0278	0	0	0.0029	0.0029	0.0278	0	0.019
MnO	0.0116	0.0065	0	0	0.0232	0.0077	0	0.0013	0.022	0.0155	0.0129	0.0039	0.009	0.009	0.0026	0.0232	0.0052	0.0013	0.0194	0.0258	0.0245	0.0103	0.0194	0	0.0129	0.0026	0.0129	0	0.0103	0.0116	0	0.0129	0.0065	0.0129	0	0.0077	0	0	0.0194	0.0207	0.0181	0	0	0.0103	0	0.0077	0	0.0323	0
FeO	0.3885	0.4335	0.4361	0.4451	0.4567	0.4451	0.4297	0.4438	0.4451	0.4606	0.4644	0.4451	0.4438	0.4528	0.4361	0.4567	0.4657	0.4245	0.4631	0.4606	0.4516	0.485	0.4516	0.4811	0.4593	0.4516	0.4593	0.4734	0.4374	0.4683	0.4696	0.4606	0.467	0.4477	0.4503	0.4528	0.476	0.467	0.4541	0.4413	0.4335	0.458	0.4837	0.4657	0.4477	0.4554	0.4516	0.4374	0.4773
Total	97.4334	98.1034	97.8064	98.0764	97.8432	97.4861	97.838	97.8805	98.0127	97.6973	97.7383	97.868	97.785	97.8796	97.6598	97.7655	97.7113	97.1663	97.3626	98.145	97.9554	97.9141	97.8479	97.9567	97.9442	97.8051	98.1927	97.7913	97.831	97.9599	97.8642	97.9644	97.644	97.6905	98.0771	97.9859	97.9511	97.6691	97.8669	97.3475	97.6062	97.5424	97.5414	97.5892	97.9614	98.0496	97.8295	97.9397	98.1476
Distance [µm]	0	4.4459	9.43313	14.4204	20.2484	24.6943	29.6815	34.6688	39.1147	44.9427	49.9299	54.9172	59.3631	64.3503	70.1783	74.6242	79.6115	84.5987	89.5859	94.8726	99.8599	104.847	109.293	114.28	120.108	125.096	129.541	134.529	140.357	145.344	149.79	154.777	159.764	165.051	170.038	175.025	180.013	184.459	190.287	195.274	199.72	204.707	209.694	219.968	224.955	229.943	234.389	240.217	245.204
[truncated: 3 more columns]

## Sheet: J25G1-32_P2Sc2
Sample	J25G1_32	J25G1_32	J25G1_32	J25G1_32	J25G1_32	J25G1_32	J25G1_32	J25G1_32	J25G1_32	J25G1_32	J25G1_32	J25G1_32	J25G1_32	J25G1_32	J25G1_32	J25G1_32	J25G1_32	J25G1_32	J25G1_32	J25G1_32	J25G1_32	J25G1_32	J25G1_32	J25G1_32	J25G1_32	J25G1_32	J25G1_32	J25G1_32	J25G1_32	J25G1_32	J25G1_32	J25G1_32	J25G1_32	J25G1_32	J25G1_32	J25G1_32	J25G1_32	J25G1_32	J25G1_32	J25G1_32	J25G1_32	J25G1_32	J25G1_32	J25G1_32	J25G1_32	J25G1_32	J25G1_32
Comment	Pl2_Sc2	Pl2_Sc2	Pl2_Sc2	Pl2_Sc2	Pl2_Sc2	Pl2_Sc2	Pl2_Sc2	Pl2_Sc2	Pl2_Sc2	Pl2_Sc2	Pl2_Sc2	Pl2_Sc2	Pl2_Sc2	Pl2_Sc2	Pl2_Sc2	Pl2_Sc2	Pl2_Sc2	Pl2_Sc2	Pl2_Sc2	Pl2_Sc2	Pl2_Sc2	Pl2_Sc2	Pl2_Sc2	Pl2_Sc2	Pl2_Sc2	Pl2_Sc2	Pl2_Sc2	Pl2_Sc2	Pl2_Sc2	Pl2_Sc2	Pl2_Sc2	Pl2_Sc2	Pl2_Sc2	Pl2_Sc2	Pl2_Sc2	Pl2_Sc2	Pl2_Sc2	Pl2_Sc2	Pl2_Sc2	Pl2_Sc2	Pl2_Sc2	Pl2_Sc2	Pl2_Sc2	Pl2_Sc2	Pl2_Sc2	Pl2_Sc2	Pl2_Sc2
wt% Oxide
Na2O	2.2673	2.5099	2.5504	2.5854	2.491	2.5382	2.4061	2.456	2.4587	2.4614	2.4398	2.4263	2.4479	2.4883	2.4304	2.4115	2.456	2.4021	2.4493	2.3819	2.4439	2.4263	2.4331	2.5706	2.7094	2.4951	2.6393	2.5746	2.4466	2.4857	2.5787	2.5328	2.5099	2.4924	2.5706	2.5638	2.545	2.4735	2.518	2.518	2.5571	2.7323	2.6905	2.5477	2.5773	2.6083	2.6622
MgO	0.0514	0.0481	0.0531	0.0547	0.0597	0.0531	0.0564	0.0481	0.0531	0.0564	0.0531	0.0564	0.0597	0.058	0.0597	0.0614	0.0547	0.0597	0.0547	0.0564	0.058	0.0597	0.0763	0.0713	0.0547	0.068	0.0663	0.0531	0.0514	0.0514	0.0514	0.0564	0.058	0.0614	0.0531	0.0564	0.063	0.0564	0.0564	0.058	0.0597	0.068	0.0564	0.0564	0.0597	0.0531	0.0481
Al2O3	32.1266	31.7317	31.7638	31.6391	31.7411	31.9697	31.76	31.8318	31.6164	31.8091	31.7751	31.7468	31.811	31.8866	31.7317	31.7014	31.6863	31.6051	31.811	31.8639	31.8923	31.743	31.7732	31.2253	31.4463	31.7128	31.5522	31.7203	31.5692	31.879	31.6599	31.7978	31.6429	31.554	31.6976	31.6353	31.6202	31.5956	31.5276	31.6504	31.5975	31.1195	31.3462	31.6126	31.5862	31.5918	31.5257
SiO2	47.4398	47.7649	47.9425	47.8569	47.6045	47.735	47.7607	47.5745	47.5039	47.6088	47.6409	47.7992	47.6965	47.8933	47.8163	47.4205	47.3713	47.4719	47.6302	47.5703	47.7264	47.474	47.5104	47.0033	48.0131	47.9126	47.9703	47.8056	47.3884	47.7264	47.8398	47.904	47.7992	47.6665	47.8334	47.7286	47.827	47.7542	48.0088	47.874	47.8847	48.0302	48.0473	47.8954	47.8206	48.0324	47.9297
K2O	0.0229	0.0181	0.0193	0.0205	0.0229	0.0181	0.0265	0.0193	0.0217	0.0205	0.0096	0.0217	0.0181	0.0253	0.0241	0.0157	0.0217	0.0145	0.0241	0.0253	0.0181	0.0193	0.0205	0.0217	0.0145	0.0205	0.0193	0.0157	0.0181	0.0193	0.0229	0.0217	0.0241	0.0229	0.0193	0.0229	0.0253	0.0193	0.0217	0.0277	0.0133	0.0217	0.0205	0.0205	0.0301	0.0253	0.0205
CaO	15.6893	15.3871	15.3871	15.2681	15.5158	15.3563	15.4514	15.3969	15.4151	15.3955	15.485	15.3479	15.3927	15.3801	15.3885	15.3521	15.4207	15.3577	15.3829	15.3675	15.4556	15.2793	15.3073	15.7691	15.1422	15.4067	15.2164	15.2877	15.3927	15.2332	15.1856	15.2374	15.2905	15.3185	15.3577	15.2863	15.2416	15.2947	15.3269	15.3647	15.3087	14.8512	15.0499	15.2821	15.3661	15.3465	14.9533
TiO2	0.0367	0.0417	0.0567	0.0567	0.0434	0.0517	0.0284	0.0567	0.0701	0.0384	0.0617	0.0501	0.0517	0.0584	0.0517	0.0467	0.025	0.0517	0.0467	0.0467	0.0467	0.0317	0.0467	0.0367	0.0517	0.04	0.0551	0.0684	0.0567	0.04	0.0584	0.0551	0.0617	0.0734	0.0684	0.0367	0.0551	0.0517	0.0534	0.0567	0.0651	0.0434	0.04	0.0317	0.0567	0.0434	0.04
Cr2O3	0.0278	0.0117	0.0322	0.0307	0.0015	0.0219	0.0175	0.0102	0.0044	0.0088	0.0292	0.0088	0.0015	0.0058	0.0205	0	0.0044	0.0146	0	0.0146	0.0102	0.0132	0.0205	0	0	0	0	0.0132	0.0146	0.0132	0	0.0044	0.0146	0	0.0015	0.0292	0	0	0.0351	0.0058	0.0029	0.0161	0.0263	0	0	0.0146	0.0161
MnO	0	0.0207	0.0065	0.0065	0.0245	0	0	0.0116	0.0065	0.0155	0	0.0142	0.0142	0.0155	0	0	0.0297	0.0103	0.022	0	0.0245	0.0116	0.0362	0.0077	0.0103	0.0129	0	0.0271	0	0	0.0013	0.0103	0.0077	0.0142	0.0207	0.0013	0.0194	0.0077	0.031	0.0077	0.0129	0.0052	0.0065	0.0026	0.0039	0.0026	0.031
FeO	0.3782	0.4258	0.4233	0.4554	0.4361	0.431	0.4464	0.4413	0.4361	0.4516	0.4567	0.4657	0.4516	0.449	0.4696	0.4477	0.4528	0.4374	0.4786	0.4426	0.4683	0.4811	0.4734	0.4554	0.4052	0.4541	0.4284	0.4734	0.4335	0.4516	0.44	0.449	0.4567	0.4631	0.4696	0.4528	0.4683	0.4567	0.4683	0.4554	0.4721	0.4413	0.4477	0.4554	0.4593	0.431	0.4233
Total	98.0399	97.9596	98.2346	97.974	97.9405	98.175	97.9534	97.8464	97.5859	97.8658	97.9512	97.937	97.9448	98.2604	97.9923	97.457	97.5226	97.4249	97.8994	97.7691	98.1441	97.5393	97.6975	97.1611	97.8475	98.1226	97.9472	98.0391	97.3712	97.8997	97.8379	98.0688	97.8654	97.6665	98.0917	97.8134	97.8647	97.7099	98.0471	98.0186	97.974	97.3288	97.7313	97.9044	97.9598	98.1489	97.6499
Distance [µm]	0	4.99995	9.99989	14.9998	19.9998	24.9997	29.9997	34.9996	39.9996	44.2023	49.2023	54.2022	59.2021	64.2021	69.202	74.202	79.2019	84.2019	89.2018	94.2018	99.2017	104.202	109.202	114.202	119.202	124.201	139.201	144.201	149.201	154.201	164.201	169.201	174.201	179.201	184.201	189.201	194.201	199.201	204.201	209.201	213.403	218.403	223.403	228.403	233.403	238.403	258.403

## Sheet: P3R-31_P2Sc1
Sample	P3R1_31	P3R1_31	P3R1_31	P3R1_31	P3R1_31	P3R1_31	P3R1_31	P3R1_31	P3R1_31	P3R1_31	P3R1_31	P3R1_31	P3R1_31	P3R1_31	P3R1_31	P3R1_31	P3R1_31	P3R1_31	P3R1_31	P3R1_31	P3R1_31	P3R1_31	P3R1_31	P3R1_31	P3R1_31	P3R1_31	P3R1_31	P3R1_31	P3R1_31	P3R1_31	P3R1_31	P3R1_31	P3R1_31	P3R1_31	P3R1_31	P3R1_31	P3R1_31	P3R1_31	P3R1_31	P3R1_31	P3R1_31	P3R1_31	P3R1_31	P3R1_31	P3R1_31	P3R1_31	P3R1_31	P3R1_31	P3R1_31
Comment	C2 Pl2 Sc1	C2 Pl2 Sc1	C2 Pl2 Sc1	C2 Pl2 Sc1	C2 Pl2 Sc1	C2 Pl2 Sc1	C2 Pl2 Sc1	C2 Pl2 Sc1	C2 Pl2 Sc1	C2 Pl2 Sc1	C2 Pl2 Sc1	C2 Pl2 Sc1	C2 Pl2 Sc1	C2 Pl2 Sc1	C2 Pl2 Sc1	C2 Pl2 Sc1	C2 Pl2 Sc1	C2 Pl2 Sc1	C2 Pl2 Sc1	C2 Pl2 Sc1	C2 Pl2 Sc1	C2 Pl2 Sc1	C2 Pl2 Sc1	C2 Pl2 Sc1	C2 Pl2 Sc1	C2 Pl2 Sc1	C2 Pl2 Sc1	C2 Pl2 Sc1	C2 Pl2 Sc1	C2 Pl2 Sc1	C2 Pl2 Sc1	C2 Pl2 Sc1	C2 Pl2 Sc1	C2 Pl2 Sc1	C2 Pl2 Sc1	C2 Pl2 Sc1	C2 Pl2 Sc1	C2 Pl2 Sc1	C2 Pl2 Sc1	C2 Pl2 Sc1	C2 Pl2 Sc1	C2 Pl2 Sc1	C2 Pl2 Sc1	C2 Pl2 Sc1	C2 Pl2 Sc1	C2 Pl2 Sc1	C2 Pl2 Sc1	C2 Pl2 Sc1	C2 Pl2 Sc1
wt% Oxide
Na2O	2.7418	2.8766	2.8968	2.8927	2.8631	2.7903	2.8159	2.8766	2.7997	2.7606	2.7539	2.7526	2.7647	2.6676	2.7229	2.6609	2.6218	2.6771	2.6461	2.5975	2.6204	2.607	2.6245	2.5247	2.5773	2.6204	2.6083	2.576	2.5814	2.576	2.5611	2.4857	2.5167	2.487	2.576	2.5517	2.6218	2.58	2.5773	2.6124	2.5396	2.6676	2.6474	2.5652	2.6043	2.6339	2.5625	2.5504	2.5261
MgO	0.0514	0.0464	0.0514	0.0531	0.0514	0.0597	0.0597	0.063	0.0647	0.0597	0.0597	0.058	0.0614	0.0597	0.0597	0.0597	0.0547	0.058	0.0663	0.0647	0.063	0.0846	0.0614	0.0696	0.0547	0.0614	0.068	0.0597	0.0647	0.073	0.063	0.0564	0.0663	0.0614	0.063	0.0647	0.0647	0.0647	0.0647	0.0647	0.058	0.0614	0.0647	0.0531	0.0564	0.0614	0.058	0.0614	0.058
Al2O3	32.1171	31.8469	31.6995	31.8356	31.6145	31.6504	31.5125	31.726	31.7279	31.9622	31.8261	31.7902	31.862	31.9527	31.9074	31.7978	31.9055	32.0737	31.8885	31.8942	32.0151	32.204	31.9584	31.9395	31.9301	32.2702	32.0264	32.1209	32.1436	31.9924	32.1039	32.1001	32.0699	31.6447	31.7524	32.0491	32.221	32.187	31.9168	31.9565	32.0321	32.0207	31.777	32.0094	32.1039	32.0037	32.0774	32.0453	32.0774
SiO2	49.1919	49.393	49.6561	49.6476	49.3416	49.316	49.2582	49.3288	49.1512	49.5556	49.3053	48.8688	49.3374	49.2988	48.7875	48.8774	48.8261	48.9394	48.6934	48.702	48.9544	49.0357	48.779	48.6613	48.3704	48.886	48.5672	48.7362	48.7084	48.5864	48.6271	48.7854	48.5522	48.1051	48.2527	48.6271	49.117	49.1983	48.7148	48.5116	48.7811	49.0229	48.0495	48.8539	48.9844	48.58	48.794	48.7148	48.702
K2O	0.0205	0.0241	0.0217	0.0277	0.0265	0.0265	0.0265	0.0325	0.0277	0.0241	0.0265	0.0217	0.0325	0.0325	0.0337	0.0205	0.0313	0.0241	0.0265	0.0217	0.0265	0.0229	0.0289	0.0229	0.0301	0.0181	0.0277	0.0217	0.0277	0.0253	0.0229	0.0277	0.0217	0.0205	0.0229	0.0265	0.0181	0.0229	0.0265	0.0193	0.0277	0.0241	0.0229	0.0253	0.0277	0.0229	0.0205	0.0229	0.0313
CaO	15.2122	15.0373	15.0821	15.1884	14.9477	15.0583	15.0793	15.0471	15.152	15.4039	15.3829	15.1422	15.3479	15.4402	15.3087	15.3465	15.4836	15.5228	15.5466	15.5298	15.6851	15.5662	15.45	15.5802	15.457	15.5886	15.4808	15.6711	15.5564	15.5494	15.6305	15.7873	15.8754	15.5172	15.4221	15.5284	15.5564	15.7075	15.5718	15.562	15.534	15.6879	15.3563	15.513	15.6627	15.576	15.541	15.5606	15.5578
TiO2	0.0484	0.045	0.04	0.0501	0.0467	0.0801	0.0534	0.0501	0.0667	0.0651	0.0768	0.0434	0.0601	0.0551	0.0768	0.0617	0.0768	0.0801	0.0467	0.0534	0.0601	0.0701	0.0617	0.0467	0.0651	0.0684	0.035	0.0467	0.0417	0.0367	0.0334	0.0567	0.0367	0.0434	0.0651	0.0651	0.0634	0.045	0.035	0.0601	0.0584	0.0384	0.0584	0.0517	0.0551	0.0517	0.0334	0.0584	0.0367
Cr2O3	0.0058	0.0322	0	0.0015	0	0.0175	0	0	0.0073	0.0058	0.0029	0.0278	0.0058	0.0044	0.0132	0	0.0044	0	0	0.0263	0	0.0058	0.0132	0.0219	0.0424	0	0.0058	0	0.019	0.0044	0.0117	0.0234	0.0263	0	0	0	0.0044	0.0146	0.0205	0.0015	0	0	0.019	0.0088	0.0088	0.0146	0.0044	0.0205	0.019
MnO	0	0.0077	0	0.0052	0.0207	0.0116	0.0065	0.0349	0.0271	0.0297	0.009	0.0065	0.0142	0.0052	0	0.0026	0	0	0.0297	0	0.0232	0.0194	0.0129	0	0	0	0.0258	0.0013	0.0142	0.0142	0.0052	0.0052	0.0258	0.0077	0.0065	0.0065	0.031	0.0232	0.0207	0	0.0116	0.0129	0.0155	0.0026	0	0.009	0	0	0.0052
FeO	0.4027	0.4297	0.4541	0.458	0.4426	0.4528	0.4464	0.4696	0.4709	0.4734	0.5082	0.5004	0.5043	0.4914	0.4786	0.4786	0.5146	0.5313	0.5082	0.5069	0.512	0.5017	0.5223	0.5004	0.5069	0.5017	0.5236	0.5056	0.5095	0.5004	0.5185	0.5082	0.503	0.4876	0.4927	0.4863	0.4824	0.4747	0.4786	0.4786	0.4773	0.4786	0.4786	0.4709	0.476	0.4811	0.4619	0.485	0.4837
Total	99.7917	99.7389	99.9017	100.16	99.3548	99.4632	99.2583	99.6284	99.4952	100.34	99.9512	99.2116	99.9903	100.008	99.3884	99.3056	99.5187	99.9065	99.452	99.3964	99.9599	100.117	99.5123	99.3674	99.0339	100.015	99.3687	99.7391	99.6664	99.3582	99.5772	99.8359	99.694	98.3746	98.6533	99.4053	100.18	100.318	99.4266	99.2665	99.5198	100.014	98.4892	99.5537	99.9791	99.4344	99.553	99.5191	99.4972
Distance [µm]	1.81899e-12	4.99809	9.99618	14.9943	20.02	25.0181	30.0162	35.0143	40.0124	45.0104	50.0085	55.0343	60.0324	65.0304	70.0285	75.0266	80.0247	85.0228	90.0485	95.0466	100.045	115.039	120.037	125.035	130.061	135.059	140.057	145.055	150.053	155.051	160.049	165.075	170.073	175.071	180.069	190.066	195.064	200.089	205.088	210.086	215.084	220.082	225.08	230.078	235.104	240.102	245.1	250.098	255.096
[truncated: 43 more columns]

## Sheet: P4G1-5_P4Sc1
Sample	P4G1_5	P4G1_5	P4G1_5	P4G1_5	P4G1_5	P4G1_5	P4G1_5	P4G1_5	P4G1_5	P4G1_5	P4G1_5	P4G1_5	P4G1_5	P4G1_5	P4G1_5	P4G1_5	P4G1_5	P4G1_5	P4G1_5	P4G1_5	P4G1_5	P4G1_5	P4G1_5	P4G1_5	P4G1_5	P4G1_5	P4G1_5	P4G1_5	P4G1_5	P4G1_5	P4G1_5	P4G1_5	P4G1_5	P4G1_5	P4G1_5	P4G1_5	P4G1_5	P4G1_5	P4G1_5	P4G1_5	P4G1_5	P4G1_5	P4G1_5	P4G1_5	P4G1_5	P4G1_5	P4G1_5	P4G1_5	P4G1_5
Comment	C4Pl4 Sc1	C4Pl4 Sc1	C4Pl4 Sc1	C4Pl4 Sc1	C4Pl4 Sc1	C4Pl4 Sc1	C4Pl4 Sc1	C4Pl4 Sc1	C4Pl4 Sc1	C4Pl4 Sc1	C4Pl4 Sc1	C4Pl4 Sc1	C4Pl4 Sc1	C4Pl4 Sc1	C4Pl4 Sc1	C4Pl4 Sc1	C4Pl4 Sc1	C4Pl4 Sc1	C4Pl4 Sc1	C4Pl4 Sc1	C4Pl4 Sc1	C4Pl4 Sc1	C4Pl4 Sc1	C4Pl4 Sc1	C4Pl4 Sc1	C4Pl4 Sc1	C4Pl4 Sc1	C4Pl4 Sc1	C4Pl4 Sc1	C4Pl4 Sc1	C4Pl4 Sc1	C4Pl4 Sc1	C4Pl4 Sc1	C4Pl4 Sc1	C4Pl4 Sc1	C4Pl4 Sc1	C4Pl4 Sc1	C4Pl4 Sc1	C4Pl4 Sc1	C4Pl4 Sc1	C4Pl4 Sc1	C4Pl4 Sc1	C4Pl4 Sc1	C4Pl4 Sc1	C4Pl4 Sc1	C4Pl4 Sc1	C4Pl4 Sc1	C4Pl4 Sc1	C4Pl4 Sc1
wt% Oxide
Na2O	3.1111	3.1637	3.0761	3.1003	2.9965	2.9682	3.0168	2.9574	2.9399	2.8752	2.886	2.8873	2.9062	2.7782	2.7903	2.8051	2.7552	2.766	2.7782	2.8159	2.8199	2.859	2.8617	2.7997	2.851	2.8092	2.8132	2.8927	2.8617	2.7768	2.793	2.8469	2.9264	2.8321	2.855	2.8617	2.8995	2.9884	2.9453	2.9669	2.917	2.8604	2.9008	2.9062	2.9291	2.9386	3.0316	3.1152	3.1515
MgO	0.0547	0.058	0.063	0.0531	0.0614	0.063	0.063	0.063	0.0663	0.0647	0.063	0.063	0.068	0.0647	0.0663	0.0597	0.068	0.068	0.073	0.0713	0.0696	0.0713	0.0746	0.0763	0.0696	0.0713	0.0647	0.063	0.0647	0.0696	0.0663	0.0647	0.0713	0.0696	0.0663	0.0663	0.068	0.0696	0.058	0.0663	0.0647	0.0614	0.073	0.0647	0.0746	0.0813	0.0647	0.0696	0.0696
Al2O3	31.4086	31.4747	31.4445	31.5125	31.5163	31.6088	31.6447	31.4822	31.7317	31.5522	31.6939	31.5843	31.6429	31.6088	31.794	31.726	31.8129	31.8526	31.6939	31.8242	31.7978	31.8224	31.8261	31.7071	31.7373	31.7638	31.7921	31.7657	31.7789	31.8696	31.6995	31.6769	31.5956	31.6693	31.7128	31.6769	31.4709	31.7732	31.5824	31.7203	31.6901	31.7997	31.9244	31.7902	32.0359	31.486	31.5446	31.4596	31.3727
SiO2	50.0134	49.9321	49.7674	49.8658	49.7888	49.6754	49.6454	49.654	49.5556	49.4914	49.6861	49.609	49.4657	49.4208	49.2325	49.4272	49.3224	49.378	49.2881	49.4079	49.5213	49.4251	49.4764	49.5406	49.5235	49.5406	49.4721	49.5235	49.4636	49.5427	49.4443	49.4165	49.5877	49.4892	49.5406	49.44	49.6433	49.6732	49.6604	49.8016	49.7674	49.5406	49.5556	49.5748	50.0369	49.577	49.731	49.9834	50.0177
K2O	0.0265	0.0313	0.0313	0.0373	0.0325	0.0313	0.0349	0.0373	0.0265	0.0265	0.0301	0.0277	0.0313	0.0265	0.0301	0.0253	0.0289	0.0229	0.0361	0.0349	0.0277	0.0349	0.0361	0.0325	0.0301	0.0313	0.0337	0.0337	0.0325	0.0325	0.0277	0.0301	0.0349	0.0289	0.0325	0.0313	0.0265	0.0277	0.0289	0.0265	0.0313	0.0241	0.0301	0.0373	0.0373	0.0277	0.0313	0.0301	0.041
CaO	14.8652	14.7924	15.0107	14.9421	15.1226	15.11	15.1254	15.1954	15.1618	15.2919	15.1352	15.1954	15.2737	15.3913	15.3689	15.3423	15.4319	15.4109	15.4263	15.3213	15.3661	15.3409	15.2849	15.3241	15.3633	15.2262	15.4319	15.2388	15.3031	15.3997	15.3171	15.2598	15.2206	15.3535	15.3507	15.2877	15.2178	15.089	15.1436	15.2751	15.4179	15.229	15.4011	15.5158	15.3325	15.1548	15.0793	14.9771	14.9309
TiO2	0.0617	0.0651	0.0434	0.0384	0.0551	0.0601	0.0617	0.0584	0.0584	0.0617	0.0634	0.0284	0.0517	0.0567	0.0751	0.0651	0.0484	0.0551	0.0551	0.0634	0.0601	0.0434	0.0617	0.04	0.0501	0.0734	0.04	0.0784	0.0567	0.0567	0.0551	0.0567	0.045	0.0768	0.0567	0.045	0.0551	0.0534	0.045	0.0567	0.0701	0.04	0.0517	0.0634	0.0584	0.0467	0.045	0.03	0.035
Cr2O3	0.019	0.0015	0.0248	0	0	0.0029	0.0307	0.0058	0	0.0044	0.0102	0	0.0205	0	0	0.0088	0.0088	0	0	0.0132	0	0.0205	0.0058	0.0161	0.0015	0	0	0.0058	0.0102	0.0336	0.0015	0.0058	0.0132	0.0205	0	0.0146	0.0015	0.0248	0.0088	0.0175	0	0	0.0438	0	0	0	0.0073	0.0058	0.0088
MnO	0.0026	0.0349	0	0.009	0.0168	0.0297	0	0.0181	0.0155	0	0.0258	0.0116	0.0181	0.0103	0.0155	0.009	0	0.0116	0.0271	0.0013	0.0232	0.0168	0.0129	0.0026	0	0.0155	0.0245	0.0194	0.0155	0	0.0336	0.0077	0.0323	0.022	0	0.0129	0.0194	0.0026	0.0052	0.0181	0.022	0.0155	0.0374	0	0.0181	0.0039	0	0	0.0207
FeO	0.4451	0.4953	0.4953	0.5236	0.5107	0.485	0.5146	0.5082	0.5185	0.5275	0.5146	0.4992	0.5056	0.5043	0.4992	0.5197	0.5159	0.4902	0.5275	0.5236	0.5004	0.5339	0.503	0.4799	0.4914	0.4837	0.4876	0.4734	0.521	0.4876	0.5004	0.503	0.5159	0.4914	0.467	0.5107	0.494	0.4927	0.4747	0.4902	0.4966	0.4876	0.5172	0.5185	0.4966	0.5185	0.4902	0.4631	0.5069
Total	100.008	100.049	99.9564	100.082	100.101	100.034	100.137	99.9799	100.074	99.8955	100.108	99.9059	99.9837	99.8616	99.8719	99.9882	99.9923	100.055	99.9052	100.077	100.186	100.168	100.144	100.019	100.118	100.015	100.16	100.094	100.108	100.269	99.9385	99.8681	100.043	100.053	100.082	99.9473	99.8958	100.195	99.9523	100.439	100.477	100.058	100.535	100.471	101.019	99.8344	100.025	100.134	100.155
Distance [µm]	7.10543e-15	5.82474	10.8166	15.8085	21.6333	26.6252	31.0636	36.0555	41.8802	46.8721	51.864	57.6888	62.1272	67.1191	72.111	77.9357	82.9276	87.9195	93.7442	98.1826	103.175	108.166	113.991	123.975	129.8	134.238	139.23	144.222	150.047	155.039	170.294	175.285	180.277	186.102	191.094	196.086	201.357	206.349	211.341	217.166	222.158	227.149	232.141	237.413	242.405	253.221	258.213	263.205	278.46
[truncated: 16 more columns]

## Sheet: P4G1-5_P6Sc1
Sample	P4G1_5	P4G1_5	P4G1_5	P4G1_5	P4G1_5	P4G1_5	P4G1_5	P4G1_5	P4G1_5	P4G1_5	P4G1_5	P4G1_5	P4G1_5	P4G1_5	P4G1_5	P4G1_5	P4G1_5	P4G1_5	P4G1_5	P4G1_5	P4G1_5	P4G1_5	P4G1_5	P4G1_5	P4G1_5	P4G1_5	P4G1_5	P4G1_5	P4G1_5	P4G1_5	P4G1_5	P4G1_5	P4G1_5	P4G1_5	P4G1_5	P4G1_5	P4G1_5	P4G1_5	P4G1_5	P4G1_5	P4G1_5	P4G1_5	P4G1_5	P4G1_5	P4G1_5	P4G1_5	P4G1_5	P4G1_5	P4G1_5
Comment	C6Pl6 Sc1a	C6Pl6 Sc1a	C6Pl6 Sc1a	C6Pl6 Sc1a	C6Pl6 Sc1a	C6Pl6 Sc1a	C6Pl6 Sc1a	C6Pl6 Sc1a	C6Pl6 Sc1a	C6Pl6 Sc1a	C6Pl6 Sc1a	C6Pl6 Sc1a	C6Pl6 Sc1a	C6Pl6 Sc1a	C6Pl6 Sc1a	C6Pl6 Sc1a	C6Pl6 Sc1b	C6Pl6 Sc1b	C6Pl6 Sc1b	C6Pl6 Sc1b	C6Pl6 Sc1b	C6Pl6 Sc1b	C6Pl6 Sc1b	C6Pl6 Sc1b	C6Pl6 Sc1b	C6Pl6 Sc1b	C6Pl6 Sc1b	C6Pl6 Sc1b	C6Pl6 Sc1b	C6Pl6 Sc1b	C6Pl6 Sc1b	C6Pl6 Sc1b	C6Pl6 Sc1b	C6Pl6 Sc1b	C6Pl6 Sc1b	C6Pl6 Sc1b	C6Pl6 Sc1b	C6Pl6 Sc1b	C6Pl6 Sc1b	C6Pl6 Sc1b	C6Pl6 Sc1b	C6Pl6 Sc1b	C6Pl6 Sc1b	C6Pl6 Sc1b	C6Pl6 Sc1b	C6Pl6 Sc1b	C6Pl6 Sc1b	C6Pl6 Sc1b	C6Pl6 Sc1b
wt% Oxide
Na2O	2.9992	2.921	2.886	2.9305	2.9076	2.8981	2.948	2.9561	3.0114	2.9911	3.0221	3.0302	3.0329	3.0531	3.0626	3.0464	2.9952	3.0491	3.0909	3.1178	3.1219	3.0585	3.099	3.0437	3.041	3.0154	2.9871	3.0248	2.9884	3.0114	2.9642	2.9574	2.9561	2.9628	2.952	2.8739	2.9237	2.9386	2.859	2.8631	2.7445	2.7552	2.797	2.7606	2.8334	2.8173	2.9413	2.9561	2.9871
MgO	0.058	0.0597	0.0597	0.063	0.0647	0.0597	0.0597	0.058	0.068	0.0647	0.068	0.0647	0.0663	0.063	0.0663	0.073	0.0746	0.0647	0.0696	0.0647	0.0647	0.0663	0.0663	0.0663	0.0597	0.063	0.0647	0.0597	0.063	0.058	0.0597	0.063	0.0597	0.0614	0.0597	0.0614	0.0614	0.0597	0.0647	0.0564	0.063	0.0647	0.0614	0.0713	0.0597	0.0696	0.063	0.0663	0.0614
Al2O3	31.3783	31.3859	31.5635	31.5408	31.6145	31.5635	31.5465	31.709	31.3349	31.1969	31.1724	31.2725	31.1327	31.2517	31.2612	31.3065	31.2706	31.2309	31.3103	31.4917	31.2517	31.316	31.3632	31.3613	31.3292	31.3103	31.2498	31.1138	31.3972	31.4634	31.3708	31.3878	31.4218	31.1932	31.3009	31.5295	31.5786	31.6806	31.6277	31.658	31.9263	31.7411	31.8035	31.5238	31.5578	31.5181	31.5049	31.469	31.3991
SiO2	49.6903	49.3224	49.2732	49.3395	49.4593	49.6369	49.6197	49.7781	49.3245	49.7032	49.5855	49.7567	49.6347	50.0198	49.8593	49.6775	49.8251	49.9021	49.87	49.962	49.8615	49.8166	49.9406	49.9257	49.8358	49.8315	49.7032	49.4144	49.5855	49.8208	49.8059	49.5149	49.7331	49.3459	49.5106	49.7246	49.746	49.3309	49.6326	49.4679	49.2111	49.3395	49.44	49.0699	49.44	49.2817	49.4957	49.6197	49.6818
K2O	0.0337	0.0325	0.0289	0.0325	0.0301	0.0301	0.0289	0.0301	0.0265	0.0337	0.0325	0.0325	0.0325	0.0301	0.0325	0.0349	0.0337	0.0361	0.0422	0.0361	0.0277	0.0398	0.0289	0.0349	0.0349	0.0301	0.0337	0.0301	0.0385	0.0337	0.0277	0.0265	0.0337	0.0265	0.0337	0.0289	0.0325	0.0289	0.0373	0.0313	0.0349	0.0337	0.0325	0.0289	0.0313	0.0373	0.0349	0.0337	0.0361
CaO	15.1044	15.3437	15.3745	15.513	15.3913	15.3395	15.3199	15.152	15.1912	15.0513	15.1898	15.0611	14.9981	15.0807	15.0275	15.0653	15.0135	14.9883	15.1058	14.9939	14.9575	15.0247	15.0471	15.0107	15.0037	15.0876	15.1296	15.117	15.2611	15.1968	15.2066	15.3059	15.131	15.1702	15.2318	15.3633	15.3269	15.2304	15.3325	15.3899	15.4626	15.4948	15.4612	15.3647	15.3549	15.3815	15.3199	15.2318	15.1086
TiO2	0.0501	0.0684	0.0651	0.0534	0.045	0.0534	0.0551	0.0534	0.0584	0.0567	0.0701	0.0634	0.0234	0.0584	0.0501	0.0584	0.0534	0.0584	0.0501	0.0617	0.0384	0.0734	0.0584	0.0434	0.0551	0.0701	0.0501	0.0617	0.0601	0.0667	0.0517	0.0467	0.0684	0.0334	0.0801	0.0517	0.0551	0.0567	0.0584	0.0501	0.0417	0.0567	0.0617	0.0717	0.0584	0.0684	0.0584	0.0567	0.04
Cr2O3	0.0117	0.0161	0	0	0.0044	0.0146	0	0	0.0292	0	0.0015	0.0161	0.0073	0.0015	0.0117	0.0278	0.0219	0	0.0015	0.019	0	0	0.0424	0	0	0.0044	0	0.0015	0.0175	0.0219	0	0	0.0088	0.0117	0	0.0351	0.0292	0.0029	0	0.019	0.0073	0	0.0146	0.0058	0	0.0234	0.0263	0.0073	0.0044
MnO	0.0077	0.0142	0	0.0284	0.0052	0	0.0194	0.0116	0	0	0	0.0168	0.0465	0.0181	0	0.022	0	0.0052	0.0103	0.0336	0.0297	0.0013	0.0207	0.0181	0	0	0.0142	0.0013	0.0207	0.0116	0.0181	0	0.0181	0.0052	0.0052	0.0168	0.0232	0.0103	0.0142	0.0052	0.0142	0.0052	0.0116	0	0	0	0.0039	0	0.0039
FeO	0.4966	0.5004	0.5249	0.5107	0.5043	0.4927	0.476	0.4786	0.4966	0.5017	0.4979	0.4747	0.5069	0.4567	0.476	0.5082	0.4979	0.4619	0.476	0.4631	0.4503	0.4644	0.4438	0.4554	0.4477	0.4631	0.4426	0.4477	0.4619	0.4464	0.4348	0.4644	0.4348	0.4143	0.431	0.4271	0.4528	0.4593	0.4747	0.4593	0.467	0.4657	0.4657	0.4953	0.4721	0.4644	0.4619	0.4734	0.4631
Total	99.8302	99.6644	99.7757	100.012	100.026	100.088	100.073	100.227	99.5406	99.5994	99.6397	99.7886	99.4813	100.033	99.8472	99.8199	99.7859	99.7967	100.027	100.244	99.8034	99.861	100.11	99.9595	99.8071	99.8756	99.6749	99.272	99.894	100.131	99.9394	99.7667	99.8655	99.2244	99.605	100.112	100.23	99.7984	100.101	100	99.9727	99.9567	100.149	99.3922	99.8077	99.6618	99.9101	99.9142	99.7856
Distance [µm]	7.33258e-12	5.94344	11.0333	15.9862	20.939	27.0195	31.9723	36.9252	62.9541	69.0345	73.9874	78.9402	84.0301	89.9735	95.0634	100.016	100.016	110.196	120.239	130.418	140.461	150.641	160.683	170.863	180.906	191.086	201.265	211.308	221.488	231.53	241.71	261.933	271.975	282.155	292.335	302.377	312.557	322.6	332.78	342.822	363.045	373.224	383.267	413.669	423.849	433.892	444.071	454.114	474.336
[truncated: 24 more columns]

[truncated: 5 more sheets: P4G1-10_P1Sc2, P6R2-14_P3Sc1, P11R1-38_P1Sc1, P11R1-38_P2Sc1, P11R1-38_P4Sc1]
